# Supplementary material for: Enhancing the Prioritization of Disease-Causing Genes through Tissue Specific Protein Interaction Networks
Source: PLoS Comput Biol. 2012 Sep 27;8(9):e1002690. doi: 10.1371/journal.pcbi.1002690 (PMC3459874; doi:10.1371/journal.pcbi.1002690)
Supplement: Dataset S1 — Entrez ids of network genes. At Datasets S2, S3, the network genes are indexed from 1 to 9998. This file contains the Entrez ids of these genes, sorted by their index. (XLSX) [file pcbi.1002690.s001.xlsx]

## Sheet: Sheet1
1
10
100
1000
10000
10001
10002
10006
10007
10009
1001
10010
10011
10013
10014
10015
10016
10017
10018
10019
1002
10021
10023
10024
10025
10026
1003
10036
10038
10039
1004
10040
10042
10043
10044
10045
10048
10049
1005
10051
10052
10053
10054
10055
10059
1006
10060
10062
10063
10066
10067
10068
10069
1007
10072
10073
10075
10076
10078
1008
10081
10083
10084
10085
10087
1009
10092
10093
10094
10095
10096
10097
10099
1010
10101
10102
10105
10109
10110
10111
10112
10113
10114
10116
10117
1012
10120
10121
10123
10124
10125
10126
10127
10128
1013
10130
10131
10133
10134
10137
10138
10139
1014
10140
10142
10146
10147
10148
10152
10153
10154
10155
10156
10158
10159
1016
10163
10164
10168
10169
1017
10174
10179
1018
10181
10188
10189
1019
10190
10193
10196
10197
10199
102
1020
10200
10203
10204
10207
10209
1021
10210
10211
10212
10213
10214
10215
10217
10219
1022
10220
10221
10226
10228
10231
10232
10233
10235
10236
10238
10239
1024
10240
10241
10243
10244
10245
10247
10248
10249
1025
10250
10252
10253
10254
10256
1026
10260
10262
10263
10266
10267
10268
10269
1027
10270
10272
10273
10274
10276
10277
10278
1028
10280
10282
10284
10285
10286
10287
10288
10289
1029
10291
10293
10294
10295
10296
10297
10298
103
1030
10300
10301
10302
10307
10309
1031
10313
10314
10316
10318
1032
10320
10321
10324
10325
10326
10327
10328
1033
10330
10332
10333
10335
10342
10344
10345
10346
1036
10360
10362
10363
10365
10369
10370
10371
10376
10379
10380
10381
10382
10383
1039
10391
103910
10392
10393
10395
10397
10398
10399
10401
10403
10406
1041
10411
10413
10418
10419
10420
10421
10422
10424
10425
10426
10427
10428
10430
10431
10432
10434
10435
10436
10438
1044
10440
10444
10445
10446
10449
1045
10450
10451
10452
10454
10456
10457
10458
10459
1046
10460
10461
10463
10465
10466
10467
10468
10469
1047
10471
10472
10474
10475
10476
10477
10478
10479
1048
10480
10481
10482
10483
10484
10485
10486
10487
10488
10489
10490
10492
10494
10495
10497
10498
10499
1050
10505
10507
10509
1051
10512
10513
10514
10516
10518
10519
1052
10521
10522
10524
10525
10526
10527
10528
10529
1053
10533
10534
10537
10538
10539
1054
10540
10541
10542
10544
10549
10550
10551
10552
10553
10556
10557
10558
1056
10562
10563
10564
10565
10566
10567
10569
10570
10571
10572
10573
10574
10575
10576
10577
10579
1058
10580
10581
10585
10588
10589
1059
10590
10591
10592
10594
10597
10598
1060
10600
10602
10603
10605
10606
10607
10608
10609
10610
10611
10612
10614
10615
10616
10617
10618
1062
10620
10621
10623
10625
10626
10627
10628
10629
1063
10630
10632
10635
10636
10640
10641
10642
10643
10644
10645
10647
10648
10651
10652
10653
10654
10656
10657
10658
10659
1066
10661
10663
10664
10666
10670
10672
10673
10675
10677
10678
1068
10681
10682
10686
10687
1069
10691
10692
10694
107
1070
107009
1071
10713
10714
10716
10717
10718
1072
10721
10725
10726
10728
1073
10730
10733
10735
10736
10741
10742
10743
10746
10747
10748
10749
1075
10750
10755
10758
10762
10763
10765
10766
10768
10769
10771
10772
10773
10775
10782
10783
10785
10787
10788
10797
10799
108
1080
10801
10802
10803
10804
10807
10808
1081
10810
10811
10813
10814
10815
10817
10818
1082
1082356
10825
10834770
1084
10842
10844
10845
10846
10847
10848
10849
10850
10856
10857
10859
10863
10865
10868
10870
10874
10877
10878
1088
10881
10885
10886
10890
10891
10892
10893
10897
10898
109
10900
10902
10903
10905
10906
10907
10910
10911
10912
10913
10914
10915
10916
10919
10920
10921
10922
10923
10924
10926
10927
10928
10929
10930
10933
10935
10938
10939
10940
10944
10945
10946
10949
10950
10951
10952
10953
10954
10955
10956
10957
10959
10960
10961
10963
10965
10969
10970
10971
10972
10973
10978
10979
10980
10981
10982
10985
10987
10988
10989
10991
10992
10994
10998
10999
11004
11005
11006
11007
11009
1101
11011
11014
11016
11018
1102
11020
11021
11026
1103
11030
11031
11033
11034
11035
11036
11037094
1104
11040
11043
11045
11047
1105
11051
11052
11054
11055
11059
11060
11061
11063
11064
11065
11067
11068
11069
1107
11072
11073
11074
11075
11076
11077
11078
11079
1108
11080
11082
11091
11092
11093
11096
11097
11098
11099
111
11100
11101
11102
11103
11104
11108
1111
11113
11117
1112
11122
11123
11124
11127
11128
11129
1113
11130
11133
11135
11137
11138
1114
11140
11141
11142
11143
11144
11145
11146
11147
11151
11153
11155
11156
11157
11158
11161
11164
11165
11168
11170
11171
11176
11177
11178
11179
11180
11183
11184
11186
11187
11188
11189
1119
11190
11193
11194
11196
11198
112
11200
11201
1121
11213
11214
11215
11216
11217
11218
11219
1122
11221
11224
11226
11227
11228
1123
11230
11231
11234
11235
11236
112398
112399
1124
112401
11243
11244
112476
11248
112483
11249
11252
11257
112574
11258
112597
11260
11261
11262
11264
11266
11267
11269
11273
11274
11275
11276
11277
11278
11279
1128
11282
11283
11284
112840
112858
112869
1129
112939
112950
113
1130
113026
113091
1131
11311
11313
113130
11315
11316
113174
11319
1132
11321
11325
113263
11329
11330
11331
11332
11333
11334
11335
11336
11337
11338
11339
1134
11340
11343
11344
11345
11346
1135
1136
113655
113675
1137
1138
113878
1139
114
1140
114034
114049
114088
1141
114131
114132
1143
114327
1144
1145
114548
114569
1146
114609
114625
1147
114769
114783
114785
114790
114793
114805
114814
114815
114822
114823
114836
114897
1149
114902
114907
114908
114928
114932
114977
114990
115106
1152
115201
115207
115265
115290
1153
115352
1154
115416
115426
1155
115557
115572
115650
115677
115704
115727
115761
1158
115817
115827
1159
115950
116
1160
116071
116085
116092
1161
116113
116138
116154
116225
1163
116349
116369
116379
1164
116443
116444
116449
116461
116484
116840
116844
116983
116985
116986
116987
117
117144
117145
117156
117157
117159
117177
117178
117194
117246
117247
117248
1173
1174
1175
117579
117581
117583
1176
117854
1179
118
1182
1184
118424
118426
118427
118429
118460
1186
118738
118788
118924
119
1191
1192
1193
119369
1195
119559
119587
1196
1198
12
120
1200
1203
1207
1208
12084547
1211
1212
121268
1213
121441
1215
121504
121506
121512
121536
121549
121951
122011
122042
122769
122786
122876
122953
122999
123
1230
123016
12309715
1231
1232
123283
1233
1234
1235
1236
1237
1238
123887
123920
124056
1241
124220
124245
1244
124401
124402
124460
124590
124801
124857
124872
124923
124925
124930
124995
125170
125336
125476
125786
1258
1259
125950
125988
1260
126014
126070
126133
126272
126282
1263
126326
126382
1264
1265
1266
1267
1268
126823
1269
126961
1270
127002
1271
1272
12751055
127557
1277
127703
1278
127833
127933
128
1280
1281
128178
1282
128229
128240
128312
1284
128434
1285
1286
1287
1288
128866
128869
1289
1290
129080
1291
1292
1293
1294
129446
1295
129521
129531
129563
1296
129685
1297
1298
129807
1299
1300
130013
1301
1303
130399
130497
1305
130540
130617
1308
130872
130916
130951
131034
1311
1312
1314
131408
1314308
131450
1315
1316
131890
132158
1325
1326
1327
13273496
132884
1329
132954
133
133396
133418
133522
133746
133957
134
1340
134147
134265
134266
134353
134391
134492
1345
134510
1345596
134728
134957
135
135112
135250
135458
1356
135927
135932
136
1361
136227
1363
136319
1364
1365
1366
1368
13682
1369
1370
137202
1373
1374
137492
137735
1378
137868
137964
137994
1380
138046
138065
1381
1382
138311
138429
138474
1385
1386
1387
1388
1390
139105
1392
1393
139324
1394
1395
139596
1396
1397
139716
1398
1399
14
1400
1401
140290
1404
140459
140461
140462
140545
140576
1406
140609
140628
140691
1407
140735
140739
140767
1408
140803
140825
140885
140890
1409
140901
1410
1412
1414
1415
142
1420
142678
142679
142891
1429
143
1431
14318451
143187
1432
143241
14336755
143379
1434
143425
1435
1436
143684
143689
1437
1438
1439
1440
1441
144165
1442
144245
1443
144455
144465
1445
1446
1447
144715
1448
1452
145258
145270
1453
1454
1455
1456
1457
1459
145957
14597912
146
1460
146057
146059
1462
1463
1464
146433
1465
1466
146691
146722
146760
1468
146849
1469
146956
147
147011
1471
147179
1472
1473
147339
1475
1476
147664
147687
1477
147700
147791
1478
147872
1479
147912
147945
148
148022
148156
148170
1482
148223
148281
1485
1487
1488
148867
1489
1490
149233
1493
149371
149428
149465
149483
1495
1496
1499
15
150
1500
150094
1501
1503
150372
1504
150421
150472
150483
150572
1506
150684
150771
1508
1509
151
1510
151056
1511
151112
151188
1512
151246
151254
1513
1514
151449
151531
151556
151613
151636
151742
151871
151888
151987
152
1520
152015
152028
152137
1523
1524
1525
152503
1527
152789
1528
153
153090
153222
1535
1536
1537
153733
154
1540
154007
154043
154075
1543
154313
1544
1545
154790
154796
154810
154865
155
155465
1557
1559
156
157
1571
157285
157310
1576
157638
157739
157769
15777285
157773
1580
158055
1583
158345
158358
1584
158471
1585
1585552
1586
158798
1588
159
159195
159296
159989
16
160
1600
1601
160140
1602
1603
1604
1605
1606
160622
1607
160851
1609
161
1610
161003
1611
1612
161247
1613
1615
1616
1617
161725
161742
1618
161835
161882
162
1620
1622
162417
162681
162699
1627
1628
1629
162952
162989
163
1630
163081
163126
1632
1633
1634
1635
163590
1636
163702
163732
1638
163882
1639
164
1641
164127
1642
1643
164312
164592
164656
1647
1649
165
1650
1652
1653
1654
1655
165530
16554039
1656
165904
165918
166
1660
1663
1665
166647
1667
166785
1668
1670
1672
167227
1673
1674
1675
1676
1677
1678
167826
167838
1683414
1683437
168417
168544
168620
168667
1687
169522
169792
169966
169981
170082
170261
170463
170506
1705432
170589
170591
170680
170685
170850
170961
171017
171392
171546
171568
1717
1718
1719
1725
1727
1728
1729
1730
1731
1734
1736
1737
1738
17384415
1739
174
1740
1741
1742
1743
1745
1746
1747
1748
1749
175
1755
1756
1758
1759
176
1760
1762
1767
177
1773
1777
1778
178
1780
1781
1783
1785
1786
1787
1788
1789
1791
1793
1794
1795
1796
1797
18
1800
1801
1803
1804
1805
1807
1808
1809
181
1810
1811
1812
1813
1814
1815
1816
1819
182
1820
1821
1822
1823
1824
1825
1826
1827
1828
1829
182979
183
1830
1831
1832
1837
1838
1839
1840
1841
1843
1844
1845
1846
1847
1848
1849
185
1852
1854
1855
1856
1857
1859
186
1861
18655708
1869
187
1870
1871
1874
1875
1876
1877
1879
1880
1889
189
1891
1892
1893
1894
1896
19
190
1901
1902
1903
1906
1907
1908
1909
191
1910
1911
1912
1915
1917
192111
19241
192683
1933
1936
1937
1938
1939
1942
1943
1944
1945
1946
1947
1948
1949
1950
1951
1952
1953
1954
1956
1958
1959
196
1961
1962
196374
196383
1964
196403
196441
196472
196477
196483
1965
196513
196528
196549
1967
1968
1969
197
197131
197257
197259
1973
197358
1974
1975
1977
1978
1979
1981
1982
1983
1984
199
1990
19909527
1991
1992
1994
1995
1996
1997
199720
199745
1998
1999
2
20
2000
200081
2001
200185
200186
2002
200316
200325
2004
2005
200504
200523
200539
200576
2006
200734
2009
200931
200958
200959
2010
2011
201158
201176
201254
201266
201294
201299
2014
201516
201562
2017
2018
201895
2019
201965
2020
2022
2023
202333
202559
2026
2027
2028
2029
203
2030
203068
203259
203260
2033
2034
203447
2035
203547
2036
2037
2038
2039
204
2040
2041
2042
2043
2044
204474
2045
2046
2047
2048
204851
2049
2050
2051
2053
2054
2056
2057
2058
2059
2060
2063
2064
2065
2066
2067
2068
2069
207
2071
2072
2073
2074
2077
2078
2079
208
2081
2091
20924
2098
2098329
2099
2100
2101
2103
2104
2107
2108
2109
211
2113
2114
2115
2117
2118
2119
212
2120
2122
2125
213
2130
2131
2132
2135191
2138
2139
214
2140
21439128
2145
2146
2147
2149
215
2150
2151
2152
2153
2155
2157
2158
2159
2160
2161
2162
2165
2167
2168
217
2170
2171
2172
21749840
2175
2176
2177
2178
2185
2186
2187
2188
2189
2191
2192
2193
2194
2195
219541
219699
2197
219738
219771
219844
2199
22
2200
220082
2201
220108
220134
220136
220158
220164
2202
2203
220388
2204
2205
22059
2206
220686
2207
220766
2208
220869
2209
220965
220972
220988
221016
221037
221079
221092
221154
221184
2212
221264
2213
221302
2214
22142
221442
[truncated: 7,998 more rows]
