# Supplementary material for: Enhancing the Prioritization of Disease-Causing Genes through Tissue Specific Protein Interaction Networks
Source: PubMed Central journal article supplement (PMC3459874; doi:10.1371/journal.pcbi.1002690), 2012-09-27
Supplement: pcbi.1002690.s010.pdf [file pcbi.1002690.s010.pdf]

| MAS threshold | Tissue-specific network type | #cases of better ranking |     |         | Wilcoxon signed-rank test p-value |
|---------------|------------------------------|--------------------------|-----|---------|-----------------------------------|
|               |                              | Tissue-specific          | Tie | Generic |                                   |
| 8%            | NR                           | 312                      | 204 | 363     | 7.6e-17                           |
| 8%            | ERW, $r_w = 0.001$           | 305                      | 273 | 301     | 0.0036                            |
| 8%            | ERW, $r_w = 0.1$             | 298                      | 357 | 224     | 0.01                              |
| 8%            | ERW, $r_w = 0.5$             | 261                      | 465 | 153     | 7.54e-7                           |
| 40%           | NR                           | 129                      | 93  | 110     | 0.004                             |
| 40%           | ERW, $r_w = 0.001$           | 127                      | 114 | 91      | 0.5466                            |
| 40%           | ERW, $r_w = 0.1$             | 141                      | 126 | 65      | 3.48e-4                           |
| 40%           | ERW, $r_w = 0.5$             | 107                      | 183 | 42      | 6.56e-7                           |
